# Supplementary material for: A Synergistic Combination of Niclosamide and Doxorubicin as an Efficacious Therapy for All Clinical Subtypes of Breast Cancer
Source: MDPI journal article supplement (doi:10.3390/cancers13133299), 2021-06-30
Supplement: s1 [file s1]

Supplementary Material

A synergistic combination of niclosamide and doxorubicin as an efficacious therapy for all clinical subtypes of breast cancer

Garima Lohiya and Dharendra S. Katti\*

Supplementary figures

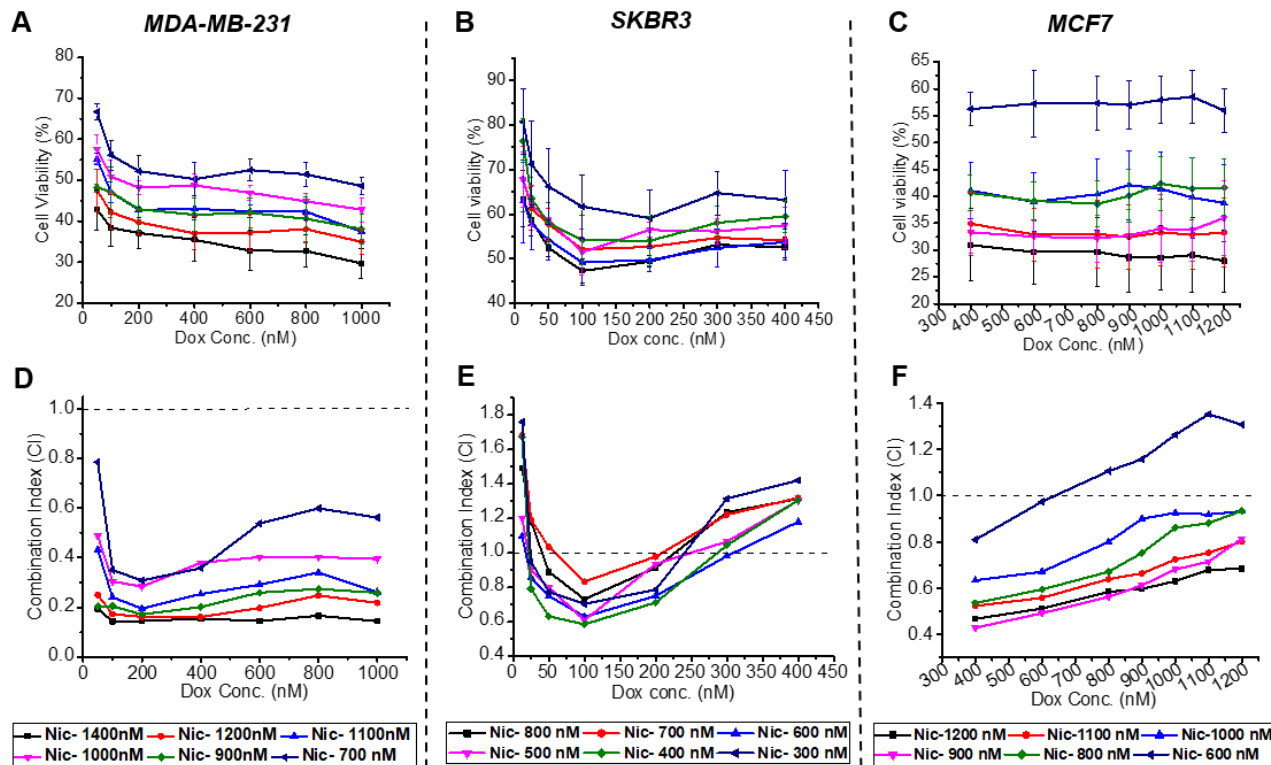

Figure S1. Effect of sequential treatment of Nic and Dox on breast cancer cells.

Cell viability line plots of different sequential combinatorial concentrations of Nic and Dox (24 h of Nic treatment followed by 24 h of Dox treatment) treated against A) MDA-MB-231, B) SKBR3 and C) MCF7 cells. Combination index line plots for D) MDA-MB-231, E) SKBR3 and F) MCF7 cells.

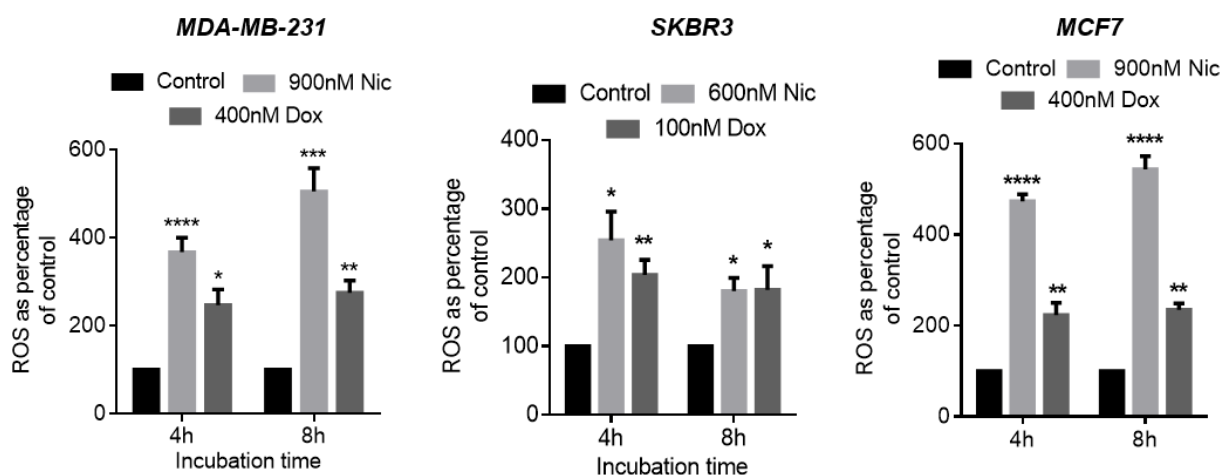

**Figure S2. ROS analysis in breast cancer cells.**

ROS analysis of Nic and Dox treated cells at indicated doses for 4 h and 8 h through DHE assay in MDA-MB-231, SKBR3 and MCF7 cells. \*( $p<0.05$ ); \*\*( $p<0.01$ ), \*\*\*( $p<0.001$ ) and \*\*\*\*( $p<0.0001$ ) indicate statistically significant difference with respect to untreated control group ( $n=3$ ).

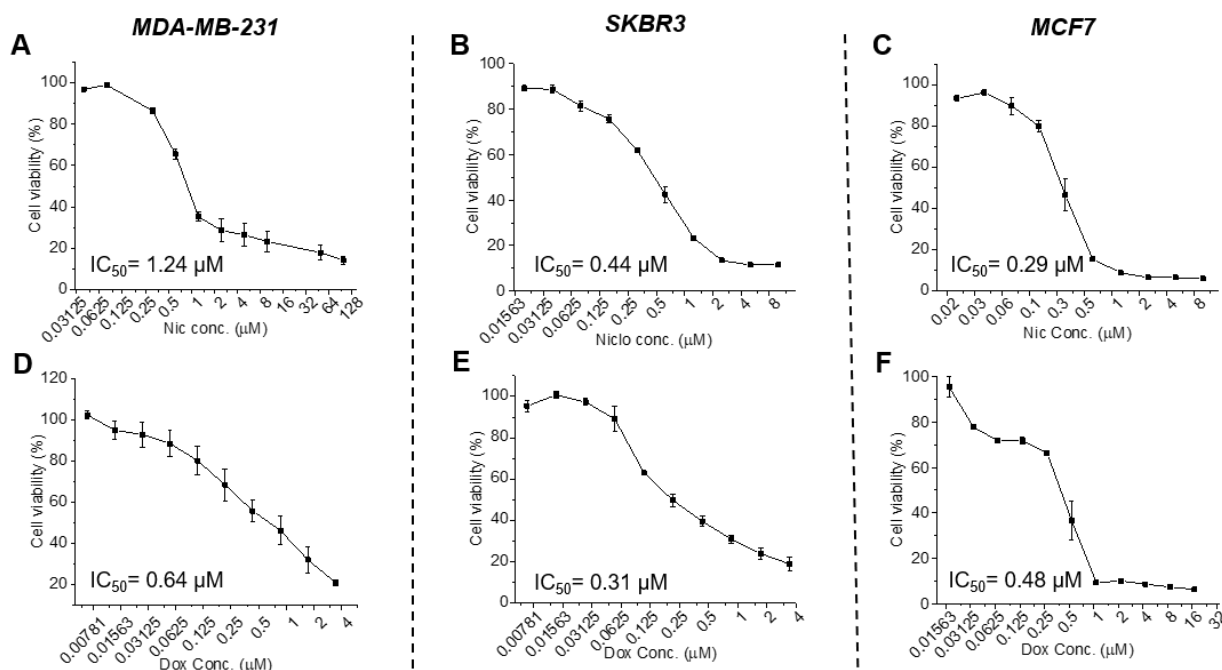

**Figure S3. Effect of individual treatment of Nic and Dox on breast cancer cells for 48 h.**

*In vitro* cytotoxicity of individual A-C) Nic and D-F) Dox on MDA-MB-231, SKBR3 and MCF7 cells at different doses for 48 h ( $n=3$ ).

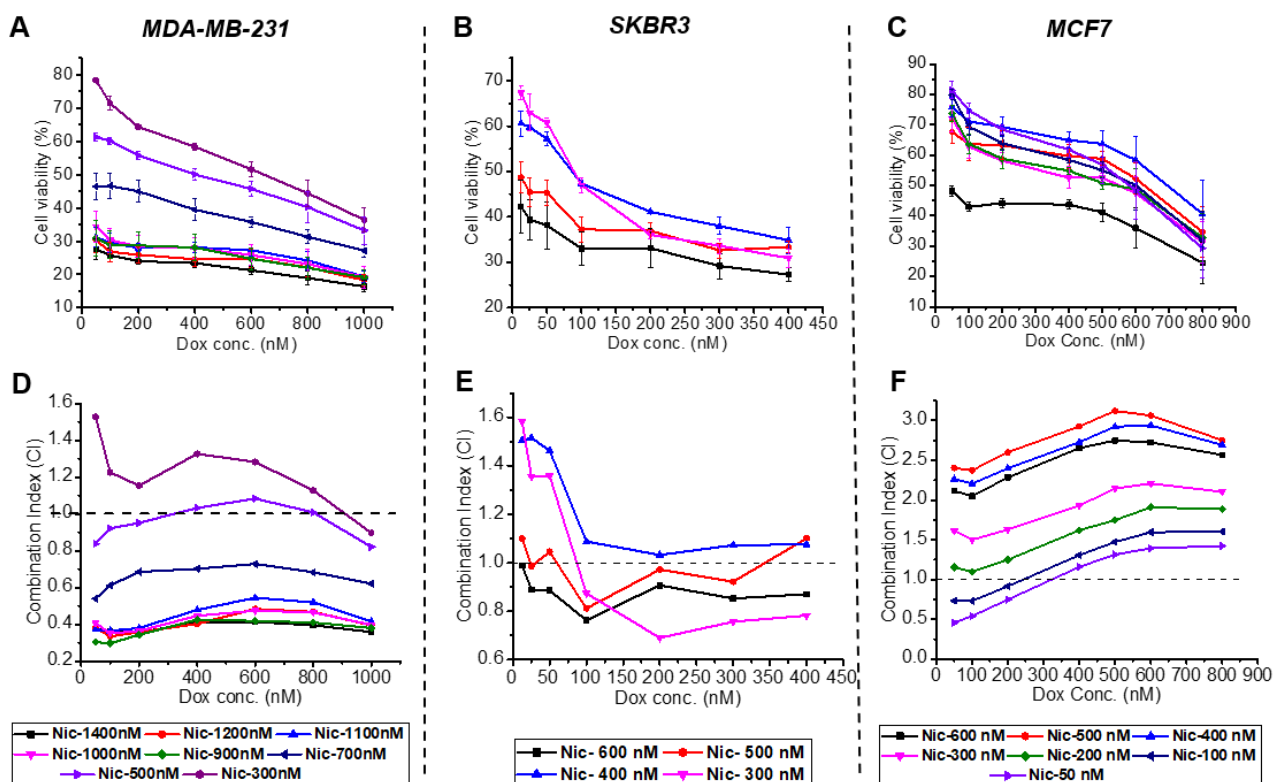

**Figure S4. Effect of concurrent treatment of Nic and Dox on breast cancer cells.**

Cell viability line plots of different concurrent combinatorial concentrations of Nic and Dox for 48 h treated against A) MDA-MB-231, B) SKBR3 and C) MCF7 cells. Combination index line plots of combination therapy for D) MDA-MB-231, E) SKBR3 and F) MCF7 cells.

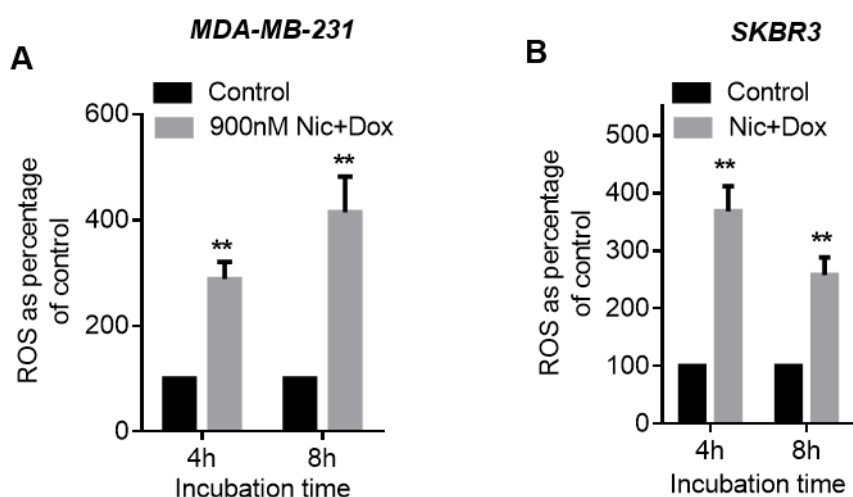

**Figure S5. ROS analysis in breast cancer cells when concurrently treated with Nic and Dox.**

Reactive oxygen species (ROS) analysis of Nic+Dox treated cells at indicated doses for 4 h and 8 h through DHE assay in A) MDA-MB-231, and B) SKBR3 cells. \*\* indicates statistically significant difference ( $p < 0.01$ ) with respect to untreated control group ( $n=3$ ).

**Table S1. List of primer sequences.**

| Name                              | Sequence                                                           |
|-----------------------------------|--------------------------------------------------------------------|
| Lymphoid enhancer factor (LEF)    | F: 5' AATGAGAGCGAATGTCGTTGC 3'<br>R: 5' GCTGTCTTTCTTTCCGTGCTA 3'   |
| T-cell factor (TCF)               | F: 5' CTGCCTTAGGGACGGACAAAG 3'<br>R: 5' TGCCAAAGAAGTTGGTCCATTTT 3' |
| cellular Myelocytomatosis (c-Myc) | F: 5' CATACATCCTGTCCGTCCAAG 3'<br>R: 5' GAGTCCGTAGCTGTTCAAGT 3'    |
| Axix inhibition protein2 (Axin2)  | F: 5' GAGTGGACTTGTGCCGACTTCA 3'<br>R: 5' GGTGGCTGGTGCAAAGACATAG 3' |
| CyclinD1 (CCND1)                  | F: 5' GCTGCGAAGTGGAACCATC 3'<br>R: 5' CCTCCTTCTGCACACATTTGAA 3'    |
